# Supplementary material
Source: publisher figshare collection journal article supplement (https://frontiersin.figshare.com/ndownloader/files/28300677)
Supplement: Supplementary file 1 [file 28300677]

## Sheet: Sheet1
Table S4. Craniodental and selected external measurements (in mm), body mass (in g) and ratios (in %) of adults of S. fraterculus, S. lowii, S. natunensis and S. robinsoni. Number of specimens included (N), mean, standard deviation (SD) and range are specified for each measurement.
	S. fraterculus (N=19)	S. lowii (N=88)	S. natunensis (N=5)	S. robinsoni (N=34)
occipitonasal length (ONL)
N	12	56	4	27
Mean (SD)	33.458 (0.595)	38.973 (0.906)	36.145 (0.559)	34.970 (0.760)
Range	32.460 - 34.510	36.930 - 41.030	35.350 - 36.550	33.600 - 36.430
zygomatic breadth (ZB)
N	11	49	4	31
Mean (SD)	19.951 (0.427)	22.712 (0.638)	20.808 (0.679)	20.673 (0.593)
Range	19.410 - 20.580	21.300 - 24.270	20.210 - 21.780	19.130 - 21.610
interorbital breadth (IB)
N	16	66	5	32
Mean (SD)	11.627 (0.331)	11.874 (0.572)	11.260 (0.252)	11.286 (0.490)
Range	11.100 - 12.330	10.940 - 13.410	11.070 - 11.660	10.280 - 12.430
length of nasals (LN)
N	15	64	5	29
Mean (SD)	9.689 (0.414)	11.735 (0.560)	10.568 (0.267)	9.871 (0.385)
Range	9.030 - 10.350	10.120 - 12.860	10.170 - 10.860	8.990 - 10.790
anterior nasal breadth (ANB)
N	10	56	5	27
Mean (SD)	5.079 (0.168)	5.192 (0.270)	4.916 (0.183)	4.680 (0.175)
Range	4.800 - 5.310	4.610 - 5.820	4.700 - 5.200	4.270 - 5.060
length of rostrum (LR)
N	15	65	5	29
Mean (SD)	14.195 (0.373)	16.103 (0.565)	15.126 (0.215)	13.964 (0.453)
Range	13.550 - 14.830	14.630 - 17.570	14.840 - 15.360	13.130 - 14.860
height of rostrum (HR)
N	14	57	5	28
Mean (SD)	7.597 (0.171)	8.409 (0.286)	7.660 (0.209)	7.649 (0.188)
Range	7.350 - 8.000	7.770 - 9.060	7.410 - 7.870	7.400 - 8.270
mastoid breadth (MB)
N	13	55	5	30
Mean (SD)	14.935 (0.255)	16.647 (0.377)	16.106 (0.323)	15.691 (0.380)
Range	14.480 - 15.430	15.800 - 17.320	15.660 - 16.560	14.840 - 16.510
height of braincase (HBC)
N	13	55	4	30
Mean (SD)	12.361 (0.151)	13.561 (0.285)	12.648 (0.290)	12.744 (0.404)
Range	12.170 - 12.680	13.070 - 14.300	12.340 - 13.010	11.910 - 13.530
length of orbit (LO)
N	17	50	5	31
Mean (SD)	8.249 (0.171)	9.480 (0.262)	8.786 (0.292)	8.711 (0.195)
Range	8.020 - 8.570	9.030 - 10.060	8.330 - 9.050	8.380 - 9.160
length of diastema (LD)
N	13	47	5	27
Mean (SD)	8.273 (0.291)	9.831 (0.385)	9.256 (0.294)	8.816 (0.321)
Range	7.840 - 8.670	9.150 - 10.790	8.910 - 9.680	8.340 - 9.560
length of bony palate (LBP)
N	16	65	5	33
Mean (SD)	10.249 (0.377)	11.985 (0.484)	11.098 (0.363)	10.924 (0.381)
Range	9.680 - 11.020	10.990 - 13.220	10.580 - 11.460	10.260 - 11.640
breadth of bony palate at fourth premolar (BBP)
N	15	59	4	26
Mean (SD)	6.799 (0.167)	8.364 (0.235)	7.920 (0.091)	7.090 (0.271)
Range	6.400 - 6.990	7.990 - 8.890	7.810 - 8.030	6.510 - 7.500
length of auditory bulla (LB)
N	15	62	5	33
Mean (SD)	6.211 (0.186)	7.461 (0.274)	7.468 (0.188)	6.783 (0.281)
Range	5.880 - 6.430	6.770 - 7.900	7.260 - 7.650	6.170 - 7.340
crown length of maxillary cheek teeth (CLPMM)
N	14	56	5	27
Mean (SD)	5.611 (0.164)	7.355 (0.236)	6.868 (0.165)	5.891 (0.153)
Range	5.320 - 5.790	6.630 - 7.810	6.720 - 7.150	5.570 - 6.160
median palatal length (MPL)
N	14	57	3	31
Mean (SD)	16.372 (0.441)	19.336 (0.561)	18.060 (0.510)	17.072 (0.418)
Range	15.480 - 17.260	18.150 - 20.650	17.480 - 18.440	16.030 - 17.830
least breadth of caudal point of zygomatic process of frontal bone (LBC)
N	16	61	5	30
Mean (SD)	13.769 (0.292)	13.994 (0.421)	13.498 (0.214)	13.238 (0.339)
Range	13.320 - 14.490	13.200 - 15.100	13.130 - 13.680	12.500 - 14.200
Maximum breadth of braincase (MBB)
N	13	34	4	32
Mean (SD)	16.381 (0.238)	18.010 (0.433)	17.275 (0.271)	16.917 (0.491)
Range	16.020 - 16.920	17.340 - 19.120	16.960 - 17.620	15.440 - 17.670
head-body (HB)
N	6	41	4	32
Mean (SD)	117.117 (7.684)	145.285 (9.455)	139.650 (8.818)	125.750 (7.117)
Range	109 - 125	127 - 169	133 - 152	105 - 140
Tail
N	18	50	3	25
Mean (SD)	77.261 (4.063)	92.798 (8.037)	86.150 (3.259)	89.160 (6.878)
Range	70.000 - 82.000	74.000 - 109.000	82.550 - 88.900	74 - 103
hindfoot
N	14	57	3	29
Mean (SD)	27.943 (2.201)	35.305 (1.900)	33.600 (0.814)	30.776 (1.527)
Range	22.000 - 30.000	32.000 - 40.000	33.00 - 35.000	27.000 - 34.000
Ear
N	15	33	1	30
Mean (SD)	11.330 (1.729)	14.394 (1.248)	12.000 (NA)	13.450 (1.309)
Range	8.900 - 12.000	12.000 - 17.000	12.000 - 12.000	11.000 - 17.000
Weight (g)
N	0	16	0	10
Mean (SD)	NA	96.531 (17.056)	NA	65.900 (9.070)
Range	NA	60.000 - 125.000	NA	49.000 - 77.000
Tail/HB
N	5	34	3	25
Mean (SD)	65.576 (3.806)	65.458 (6.579)	61.953 (4.725)	70.960 (6.940)
Range	61.480 - 71.430	52.980 - 75.560	57.240 - 66.690	55.970 - 84.430
hindfoot/HB
N	1	36	2	26
Mean (SD)	24.770 (NA)	24.297 (2.256)	24.875 (0.125)	24.655 (1.879)
Range	24.770 - 24.770	19.050 - 29.850	24.750 - 25.000	20.000 - 29.310
Ear/HB
N	1	21	1	27
Mean (SD)	9.170 (NA)	9.560 (1.238)	7.890 (NA)	10.859 (1.231)
Range	9.170 - 9.170	7.140 - 12.690	7.890 - 7.890	9.230 - 14.410
